# Supplementary material for: Multi-color emission and temperature promoted luminescence efficiency of stimuli-responsive stoichiomorphic ionic co-crystals
Source: Royal Society of Chemistry journal article supplement (doi:10.1039/d5tc01421b), 2025-01-01
Supplement: d5tc01421b1.pdf [file d5tc01421b1.pdf]

## Electronic Supporting Information

### Multi-color emission and temperature promoted luminescence efficiency in stimuli-responsive stoichiomorphic ionic co-crystals

Asif A. Malik,<sup>a</sup> Akkarakkaran Thayyil Muhammed Munthasir,<sup>b</sup> Pakkirisamy Thilagar,<sup>b\*</sup> and Ajjaz A. Dar<sup>a\*</sup>

<sup>a</sup>Crystal Engineering Laboratory, Department of Chemistry, University of Kashmir, Hazratbal, Srinagar-190006, Jammu & Kashmir, India.

<sup>b</sup>Department of Inorganic and Physical Chemistry, Indian Institute of Science, Bangalore 560012, India.

\* Corresponding author: [thilagar@iisc.ac.in](mailto:thilagar@iisc.ac.in);

[aijazku2015@gmail.com](mailto:aijazku2015@gmail.com)/[daraijaz@uok.edu.in](mailto:daraijaz@uok.edu.in) ORCID: 0000-0002-6180-274X;

**Table S1:** Crystallographic Table of **P1** and **P2**.

**Table S2:** Comparative  $\lambda_{\text{abs}}$  (nm),  $\lambda_{\text{em}}$  (nm),  $\tau_{\text{avg}}$  (ns), and PLQY values of **P1** and **P2**.

**Table S3:** Lifetime values of the pristine sample of **P1** at different temperatures.

**Table S4:** Interaction and lattice energy calculation of **P1**.

**Table S5:** Interaction and lattice energy calculation of **P2**.

**Figure S1:** <sup>1</sup>H-NMR spectra of **P1** recorded in DMSO-*d*<sub>6</sub> solvent (500MHz).

**Figure S2:** <sup>1</sup>H-NMR spectra of **P2** recorded in DMSO-*d*<sub>6</sub> solvent (500MHz).

**Figure S3:** <sup>13</sup>C-NMR spectra of **P1** recorded in DMSO-*d*<sub>6</sub> solvent (500MHz).

**Figure S4:** <sup>13</sup>C-NMR spectra of **P2** recorded in DMSO-*d*<sub>6</sub> solvent (500MHz).

**Figure S5:** HR-MS Spectra of **P1**.

**Figure S6:** HR-MS Spectra of **P2**.

**Figure S7:** Cyclic Voltammograms of **P1** and calculated HOMO-LUMO gaps.

**Figure S8:** Cyclic Voltammograms of **P2** and calculated HOMO-LUMO gaps.

**Figure S9:**  $d_{\text{norm}}$ , Shape-index, and Curvedness surface of molecular solid **P1**.

**Figure S10:**  $d_{\text{norm}}$ , Shape-index, and Curvedness surface of molecular solid **P2**.

**Figure S11:** Columb energy, dispersion energy, and total energy calculations of **P1**.

**Figure S12:** Columb energy, dispersion energy, and total energy calculations of **P2**.

**Figure S13:** Solution phase Absorption spectra of **P1** and **P2** in THF(10<sup>-3</sup> M conc.).

**Figure S14:** Solution phase Absorption spectra of **P1** and **P2** compared with the precursors in THF (10<sup>-3</sup> M conc.).

**Figure S15:** Ground state ( $S_0$ ) optimized geometry of compounds (a) **P1**, and (b) **P2**. (c) Frontier molecular orbital diagram (iso value 0.04) and corresponding energy values for **P1** and **P2**. The theoretical calculations are performed using density functional theory (DFT) at the B3LYP/6-31G(d) level of theory by taking the coordinated form molecular structure obtained from single crystal XRD.

**Figure S16:** DLS studies of **P1**.

**Figure S17:** DLS studies of **P2**.

**Figure S18:** P-XRD of **P1** compared with AIEgen **P1**.

**Figure S19:** P-XRD of **P2** compared with AIEgen **P2**.

**Figure 20:** (a) Steady-state photoluminescence Spectra at  $\lambda_{\text{ex}}$  = 375 nm and (b,c) fluorescence decay profiles for the pristine sample of **P1** at different temperatures (b)  $\lambda_{\text{ex}}$  = 375 nm  $\lambda_{\text{em}}$  = 490 nm and (c)  $\lambda_{\text{ex}}$  = 375 nm  $\lambda_{\text{em}}$  = 545 nm.

**Figure S21:** Fluorescence lifetime profile of **P2-G**.

**Table S1:** Crystallographic Table of **P1** and **P2**.

| Compounds                                                         | P1                                                                           | P2                                                                                               |
|-------------------------------------------------------------------|------------------------------------------------------------------------------|--------------------------------------------------------------------------------------------------|
| CCDC No.                                                          | 2420428                                                                      | 2420429                                                                                          |
| Empirical formula                                                 | C <sub>34</sub> H <sub>28</sub> N <sub>4</sub> O <sub>6</sub> S <sub>2</sub> | C <sub>34</sub> H <sub>28</sub> N <sub>4</sub> O <sub>7</sub> S <sub>2</sub><br>H <sub>2</sub> O |
| Fw                                                                | 668.72                                                                       | 502.50                                                                                           |
| Temp [K]                                                          | 150 K                                                                        | 293 K                                                                                            |
| Crystal system                                                    | Orthorhombic                                                                 | Monoclinic                                                                                       |
| Space group                                                       | A b a 2                                                                      | P 21/c                                                                                           |
| <i>a</i> , [Å]                                                    | 13.6097(6)                                                                   | 7.4079(17)                                                                                       |
| <i>b</i> , [Å]                                                    | 11.9939(6)                                                                   | 12.821(3)                                                                                        |
| <i>c</i> , [Å]                                                    | 18.2054(7)                                                                   | 12.291(3)                                                                                        |
| $\alpha$ , [°]                                                    | 90                                                                           | 90                                                                                               |
| $\beta$ , [°]                                                     | 90                                                                           | 105.384(7)                                                                                       |
| $\gamma$ , [°]                                                    | 90                                                                           | 90                                                                                               |
| <i>V</i> , [Å <sup>3</sup> ]                                      | 2971.7(2)                                                                    | 1125.5(5)                                                                                        |
| <i>Z</i>                                                          | 4                                                                            | 2                                                                                                |
| D(calcd)<br>[Mg/cm <sup>3</sup> ]                                 | 1.495                                                                        | 1.483                                                                                            |
| $\mu$ [mm <sup>-1</sup> ]                                         | 0.235                                                                        | 0.289                                                                                            |
| $\Theta$ range [°]                                                | 24.975                                                                       | 24.999                                                                                           |
| Reflns collected                                                  | 2568                                                                         | 1982                                                                                             |
| Indep. Reflns                                                     | 2208                                                                         | 1825                                                                                             |
| GOF                                                               | 1.080                                                                        | 1.131                                                                                            |
| R1( <i>I</i> <sub>0</sub> > 2 $\sigma$ ( <i>I</i> <sub>0</sub> )) | 0.0821                                                                       | 0.0474                                                                                           |
| wR2(all data)                                                     | 0.2320                                                                       | 0.1331                                                                                           |

**<sup>1</sup>H NMR:** To validate the stoichiometry of the synthesized compounds, detailed analysis of the <sup>1</sup>H NMR spectra were conducted, as shown in Figures S1 and S2 below.

For compound **P1**, the spectrum clearly supports a 1:2 stoichiometric ratio, as evidenced by the integration of key aromatic and aliphatic proton signals. Specifically, a singlet at  $\sim\delta$  6.8 ppm corresponding to 1H from the acid component is accompanied by signals at  $\sim\delta$  7.2–7.8 ppm integrating for 4H and 8H, consistent with the presence of two equivalents of the base component. For **P2**, the spectrum reveals equimolar integration of characteristic aromatic protons ( $\sim\delta$  7.0–7.8 ppm), showing a 4H:4H ratio from the acid and base components, respectively, with matching aliphatic signal integration, confirming a 1:1 stoichiometry.

Note: On dissolution in high polar solvent like DMSO the co-crystals possibly disintegrate, which is accompanied by reversal of proton transfer, therefore unlike in crystal phase the protons on two aromatic rigs of BPe will form equivalent sets in both complexes.

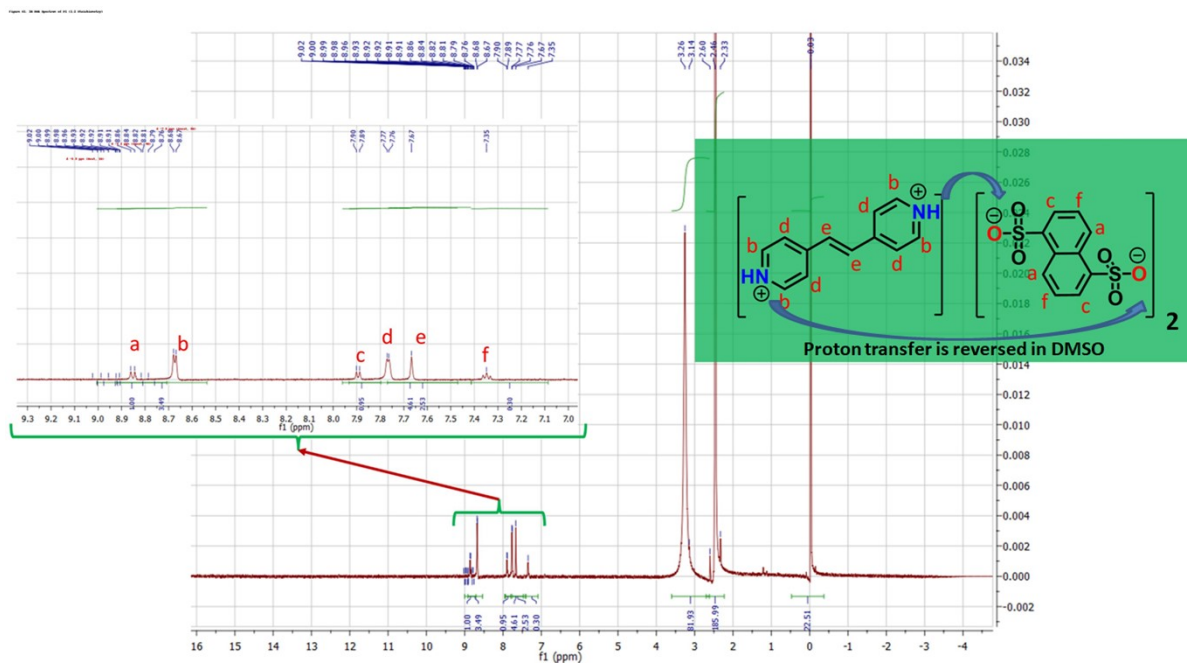

**Figure S1:**  $^1\text{H}$ -NMR spectra of **P1** recorded in  $\text{DMSO}-d_6$  solvent (500MHz).

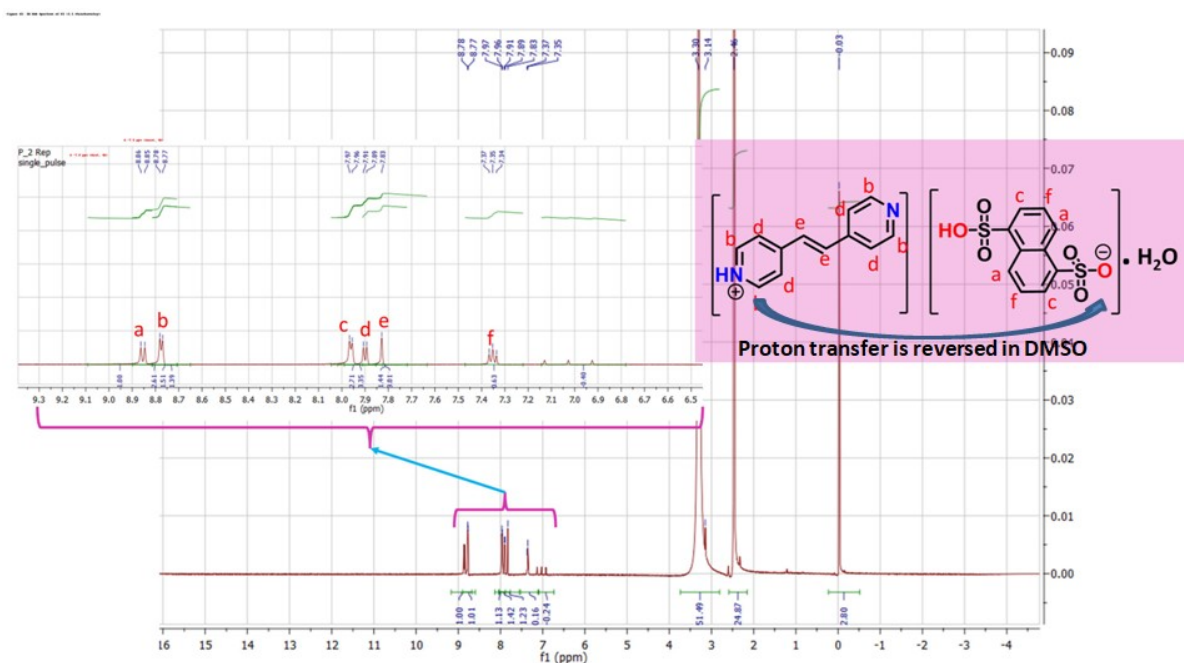

**Figure S2:**  $^1\text{H}$ -NMR spectra of **P2** recorded in  $\text{DMSO}-d_6$  solvent (500MHz).

$^{13}\text{C}$  NMR (500 MHz,  $\text{DMSO}-d_6$ )  $\delta$  146.59 – 146.38 (m), 145.56 – 145.17 (m), 134.91 – 134.52 (m), 133.75 – 133.54 (m), 133.49 – 133.28 (m), 129.25 – 129.04 (m), 127.44 – 127.23 (m), 124.30 – 123.93 (m).

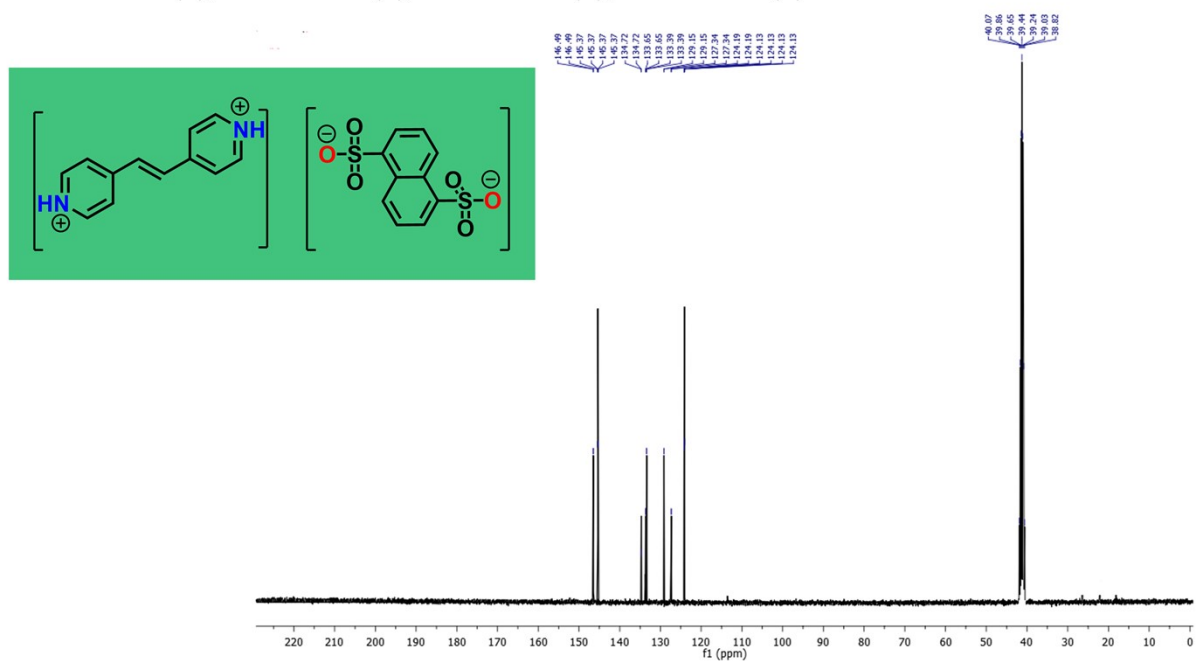

**Figure S3:**  $^{13}\text{C}$ -NMR spectra of **P1** recorded in  $\text{DMSO}-d_6$  solvent (500MHz).

$^{13}\text{C}$  NMR (500 MHz,  $\text{DMSO}-d_6$ )  $\delta$  146.59 – 146.38 (m), 145.56 – 145.17 (m), 134.91 – 134.52 (m), 133.75 – 133.54 (m), 133.49 – 133.28 (m), 129.25 – 129.04 (m), 127.44 – 127.23 (m), 124.30 – 123.93 (m).

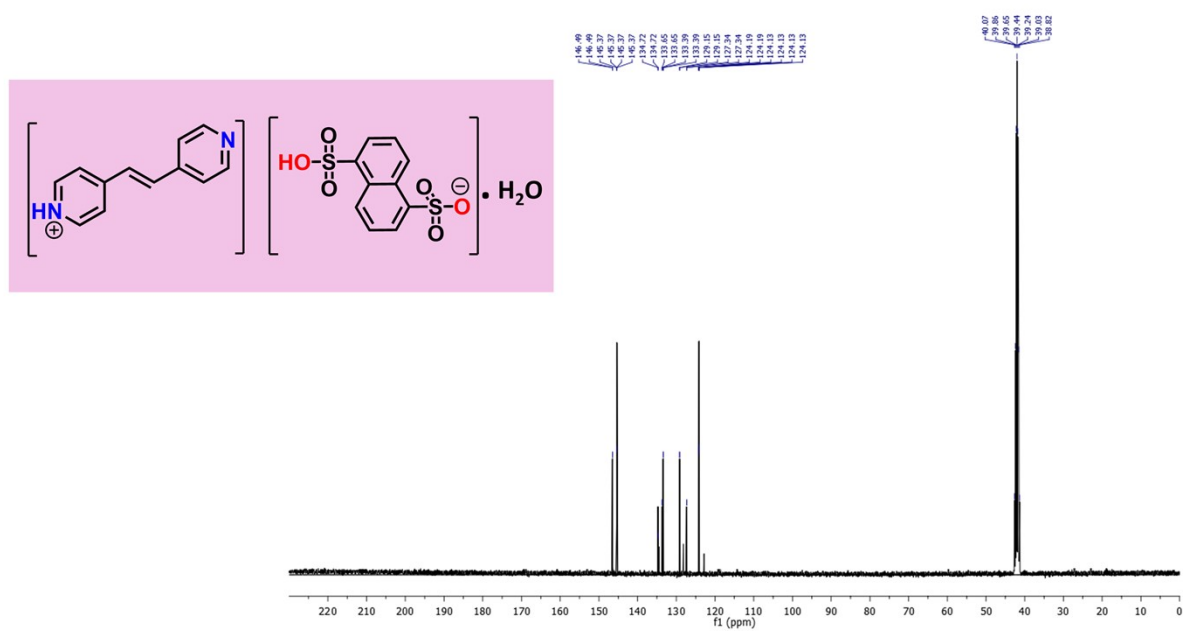

**Figure S4:**  $^{13}\text{C}$ -NMR spectra of **P2** recorded in  $\text{DMSO}-d_6$  solvent (500MHz).

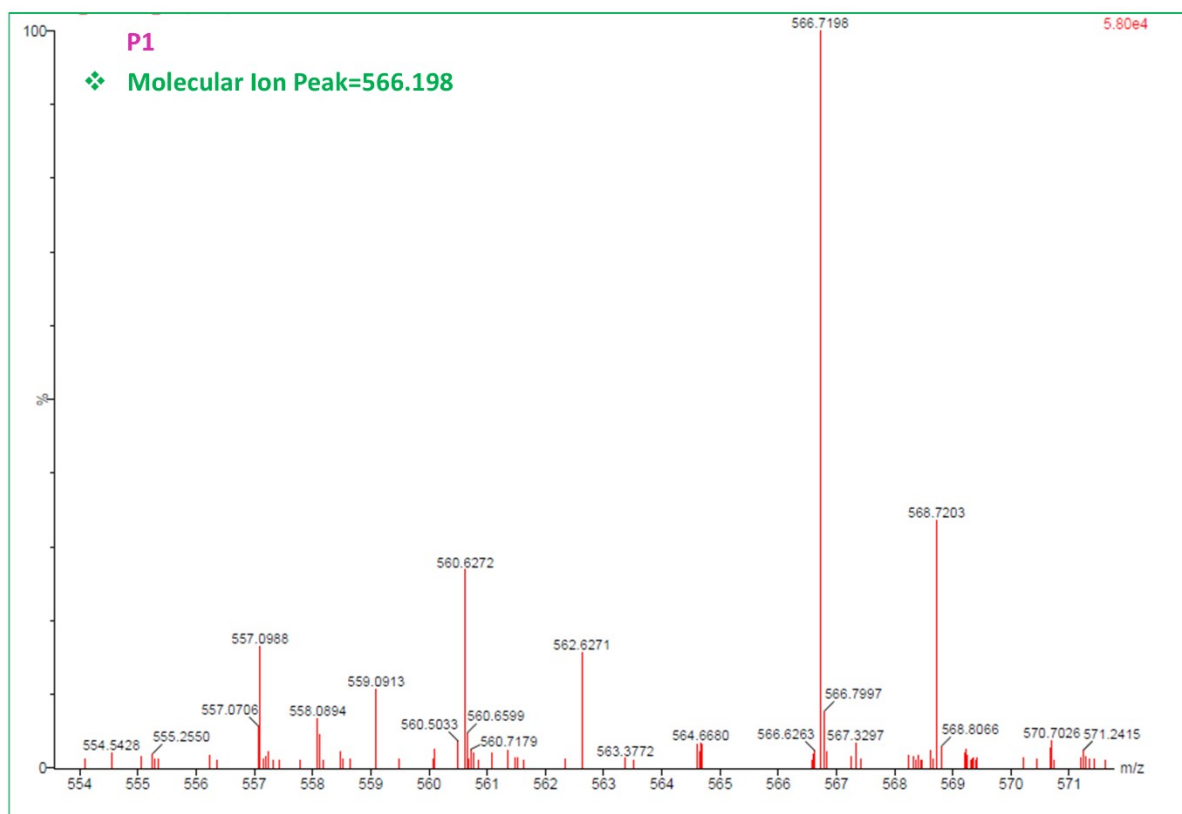

**Figure S5: HR-MS Spectra of P1.**

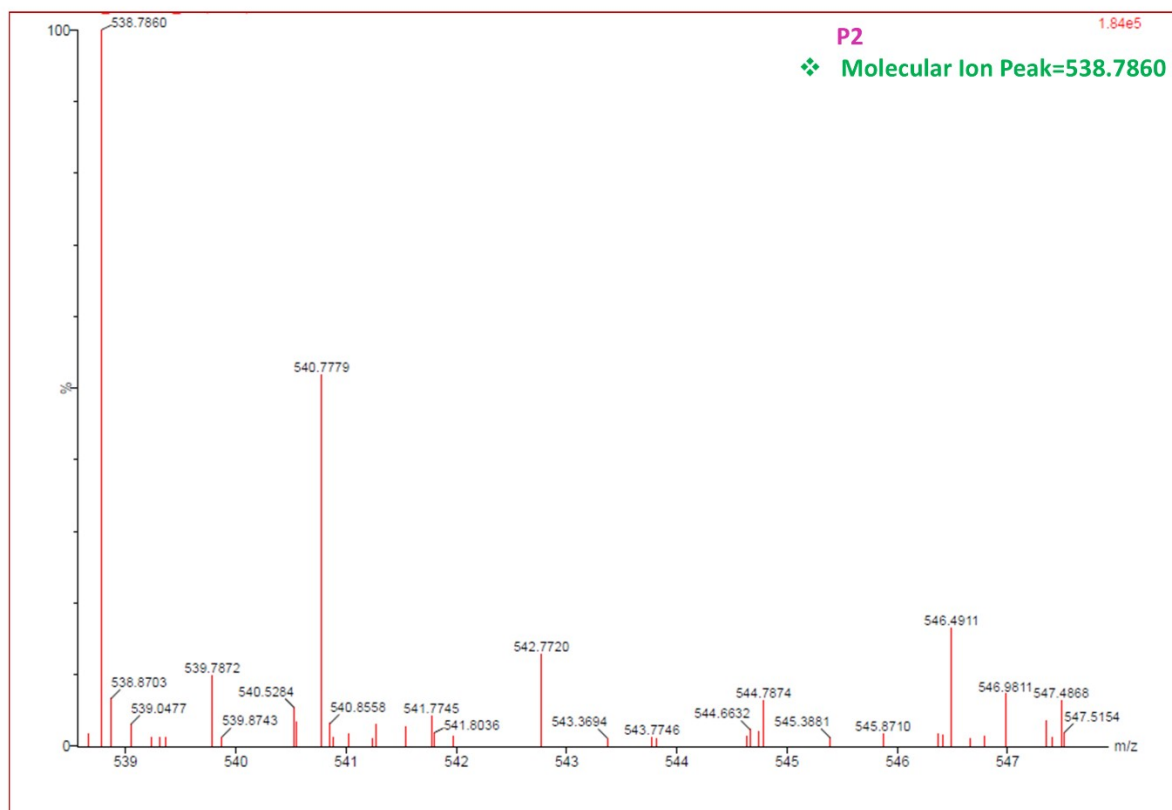

**Figure S6: HR-MS Spectra of P2.**

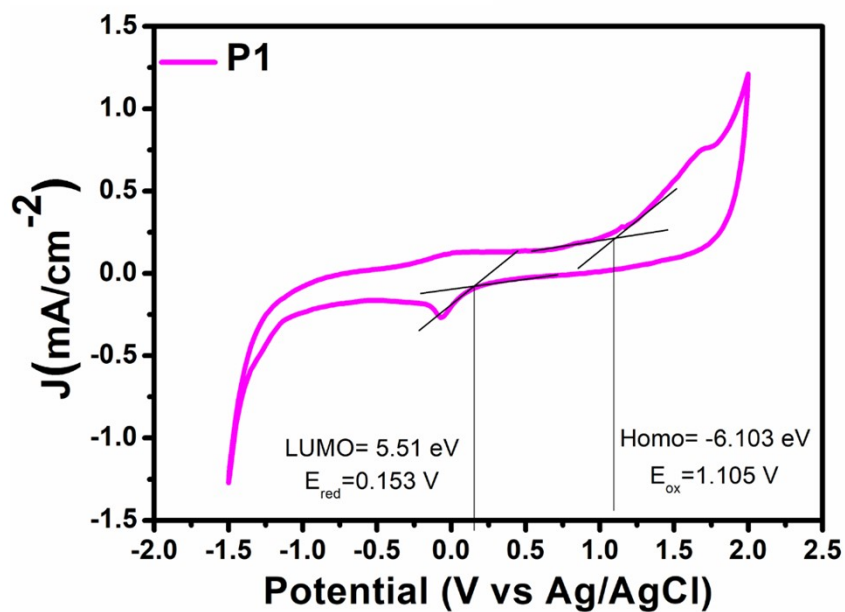

**Figure S7:** Cyclic Voltammograms of **P1** and calculated HOMO-LUMO gaps.

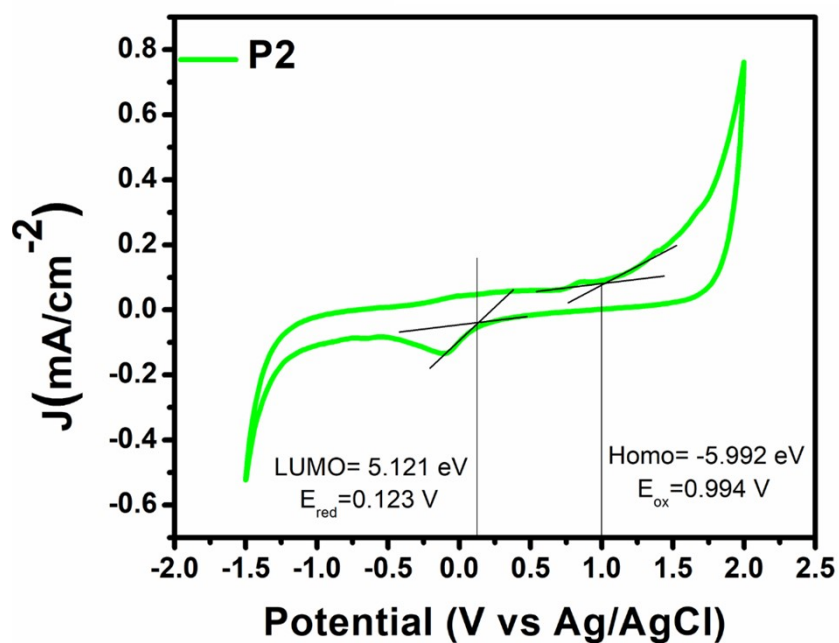

**Figure S8:** Cyclic Voltammograms of **P2** and calculated HOMO-LUMO gaps.

**Table S2:** Comparative  $\lambda_{\text{abs}}$  (nm),  $\lambda_{\text{em}}$  (nm),  $\tau_{\text{avg}}$  (ns), and PLQY values of **P1** and **P2**.

| Crystal Forms | $\lambda_{\text{abs}}$ (nm) | $\lambda_{\text{em}}$ (nm) | $\tau_{\text{avg}}$ (ns) | $\Phi_{\text{PL}}$ |
|---------------|-----------------------------|----------------------------|--------------------------|--------------------|
| <b>P1</b>     | 272                         | 490                        | 13.68                    | 31.3 %             |
| <b>P2</b>     | 289                         | 545                        | 5.26                     | 24.1 %             |

$\lambda_{\text{abs}}$  is the absorption maxima,  $\lambda_{\text{em}}$  is the emission maxima,  $\tau_{\text{avg}}$  is the average lifetime, and  $\Phi_{\text{PL}}$  is the total photoluminescence quantum yield



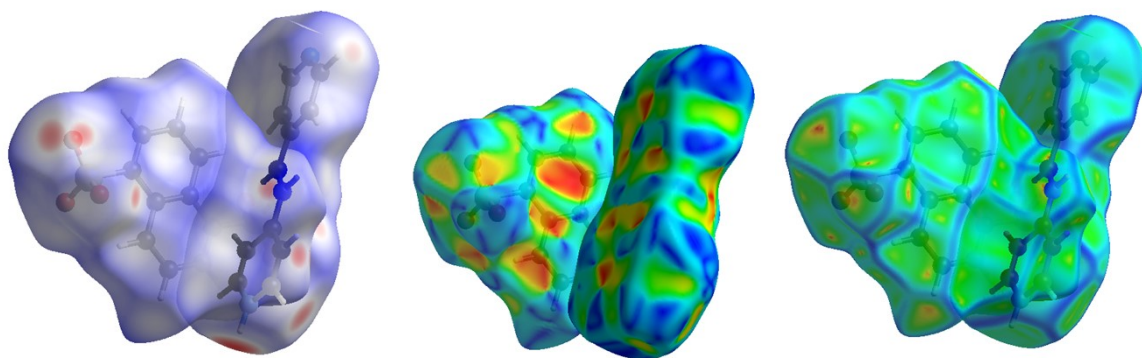

**Figure S9:**  $d_{\text{norm}}$ , Shape-index, and Curvedness surface of molecular solid **P1**.

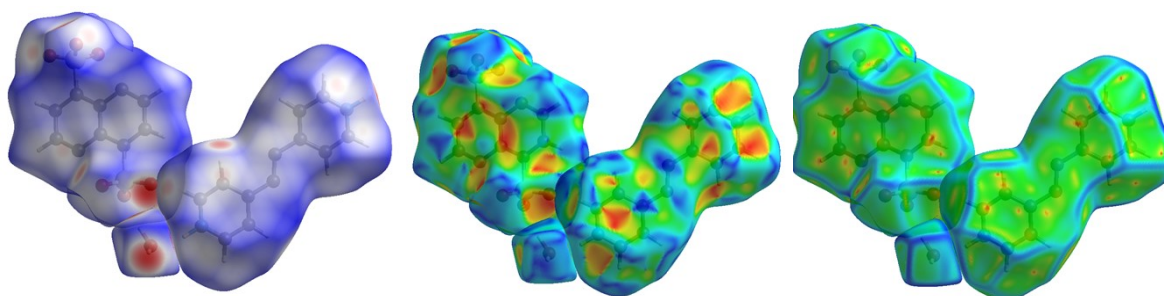

**Figure S10:**  $d_{\text{norm}}$ , Shape-index, and Curvedness surface of molecular solid **P2**.

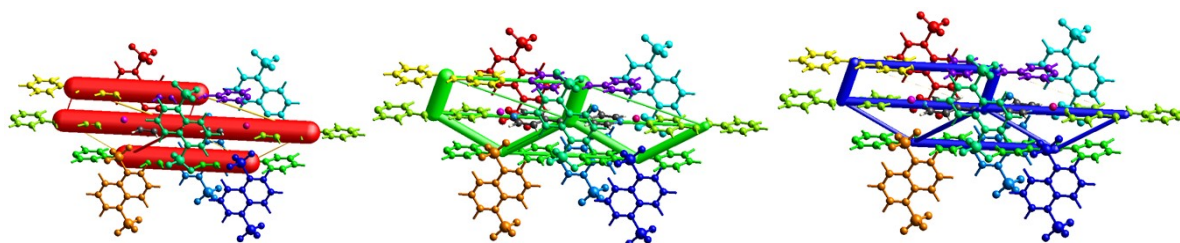

**Figure S11:** Columb energy, dispersion energy, and total energy calculations of **P1**.

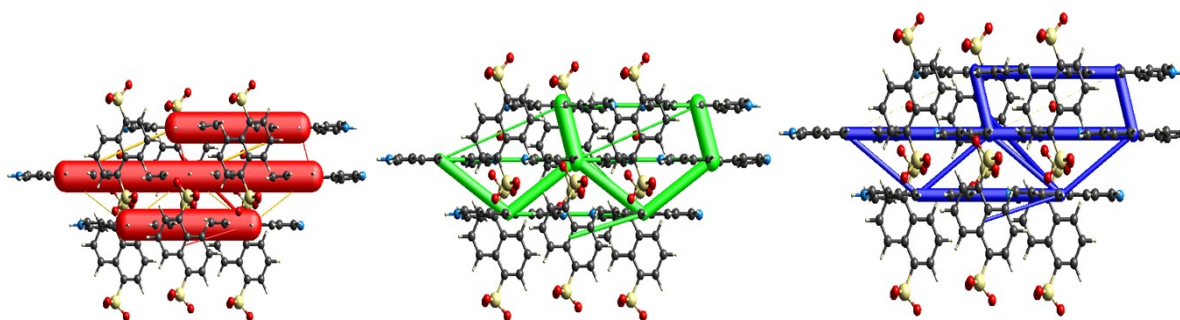

**Figure S12:** Columb energy, dispersion energy, and total energy calculations of **P2**.

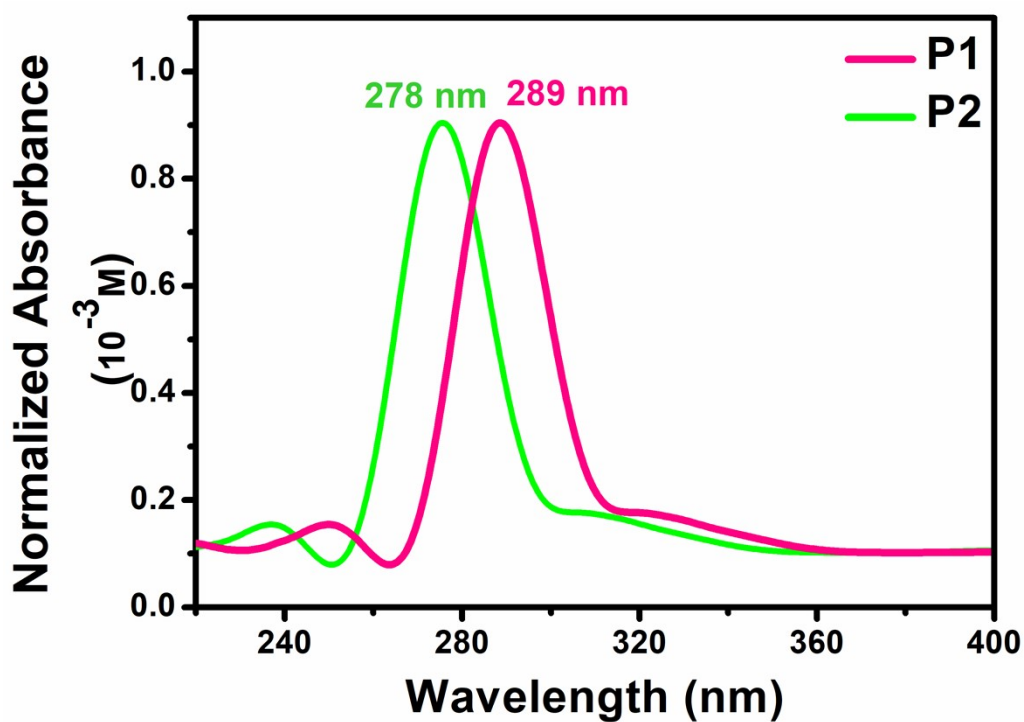

**Figure S13:** Absorption spectra (normalized to 1) of **P1** and **P2** in THF( $10^{-3}$  M conc.).

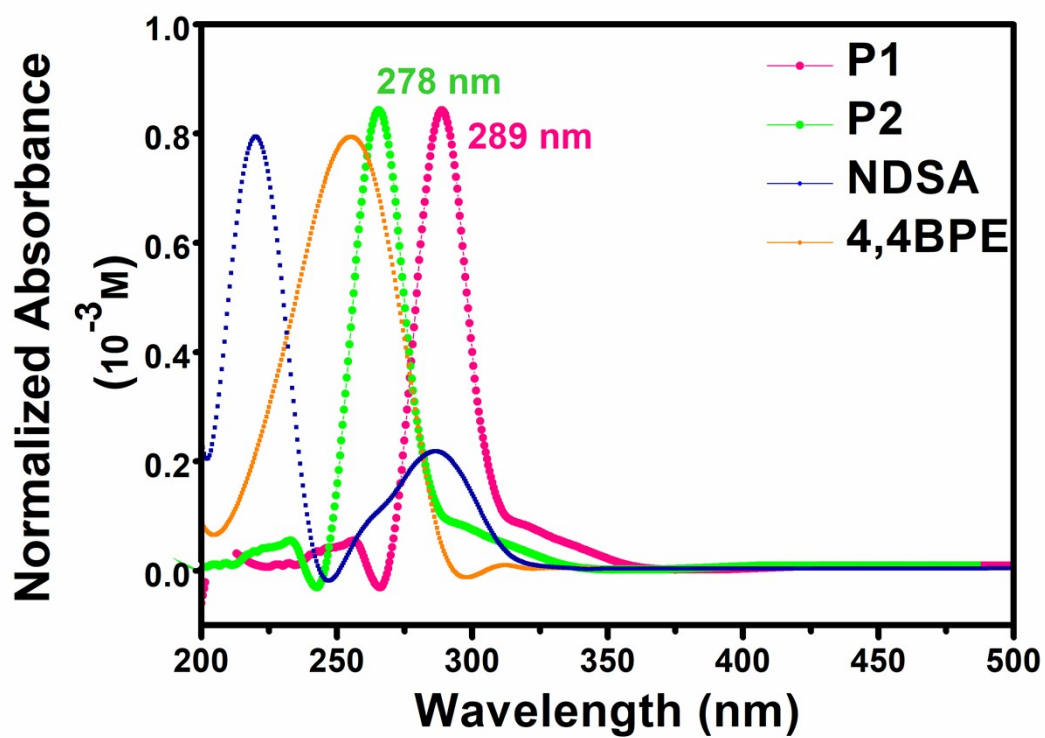

**Figure S14:** Absorption spectra (normalized to 1) of **P1** and **P2** compared with the precursors in THF ( $10^{-3}$  M conc.).



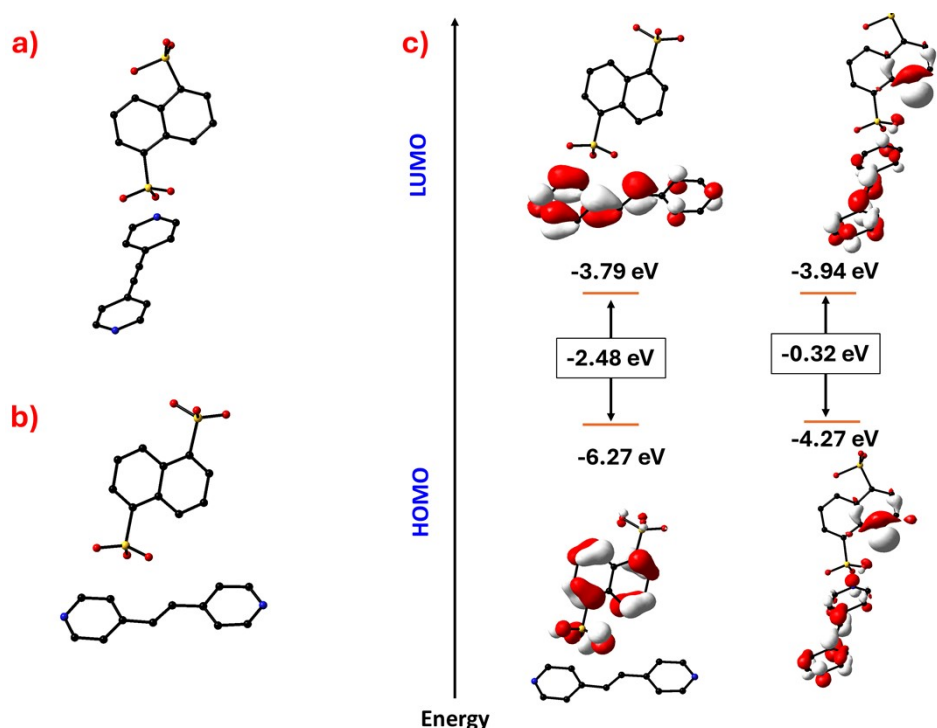

**Figure S15:** Ground state ( $S_0$ ) optimized geometry of compounds (a) **P1**, and (b) **P2**. (c) Frontier molecular orbital diagram (iso value 0.04) and corresponding energy values for **P1** and **P2**. The theoretical calculations are performed using density functional theory (DFT) at the B3LYP/6-31G(d) level of theory by taking the coordinated form molecular structure obtained from single crystal XRD.

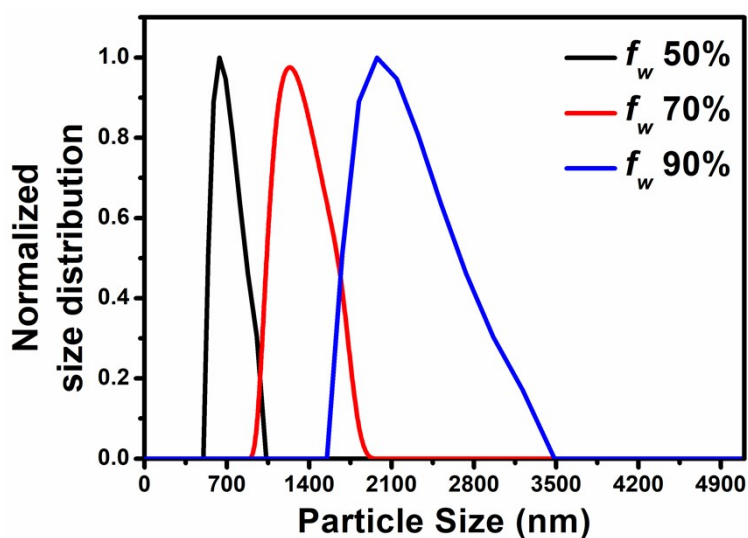

**Figure S16 (a) :** Dynamic Light Scattering (DLS) Size Distribution Profiles of AIE **P1**.

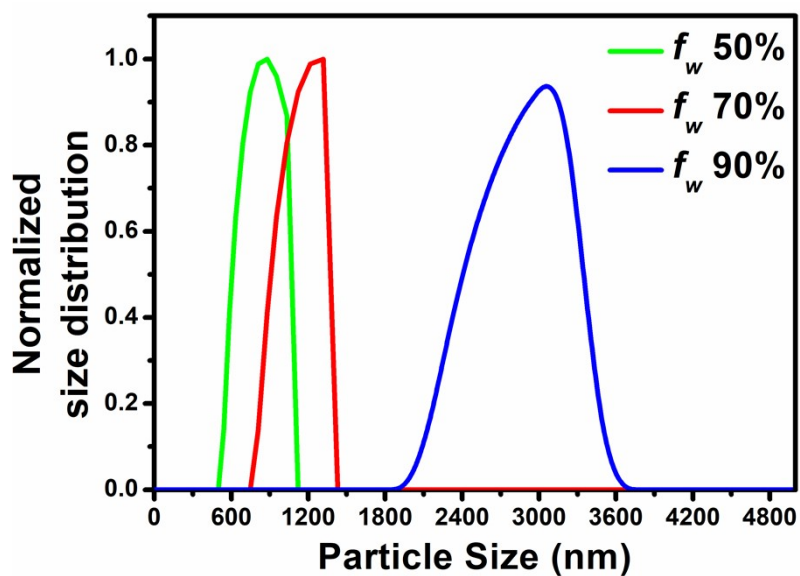

Figure S16 (b) Dynamic Light Scattering (DLS) Size Distribution Profiles of AIE **P2**.

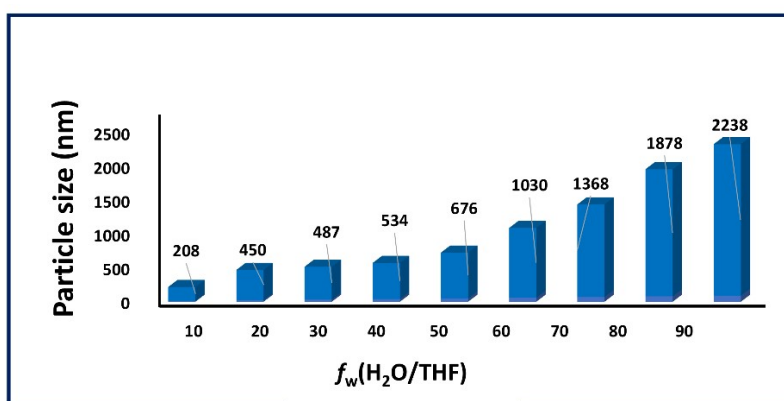

Figure S17 (a) : DLS studies of **P1**.

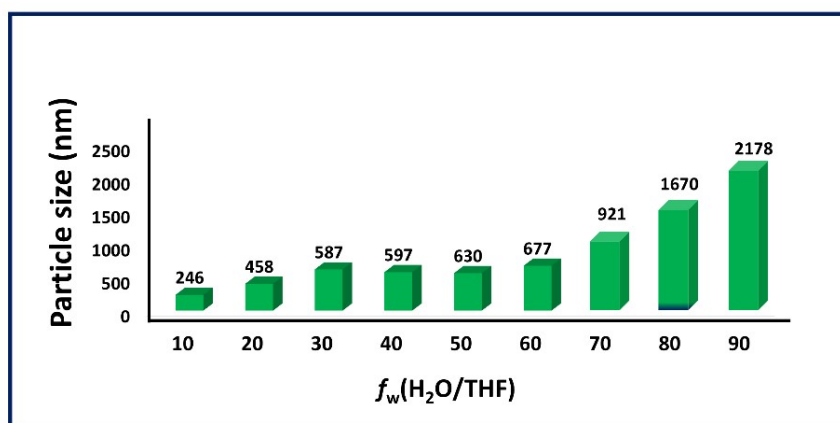

Figure S17 (b): DLS studies of **P2**.

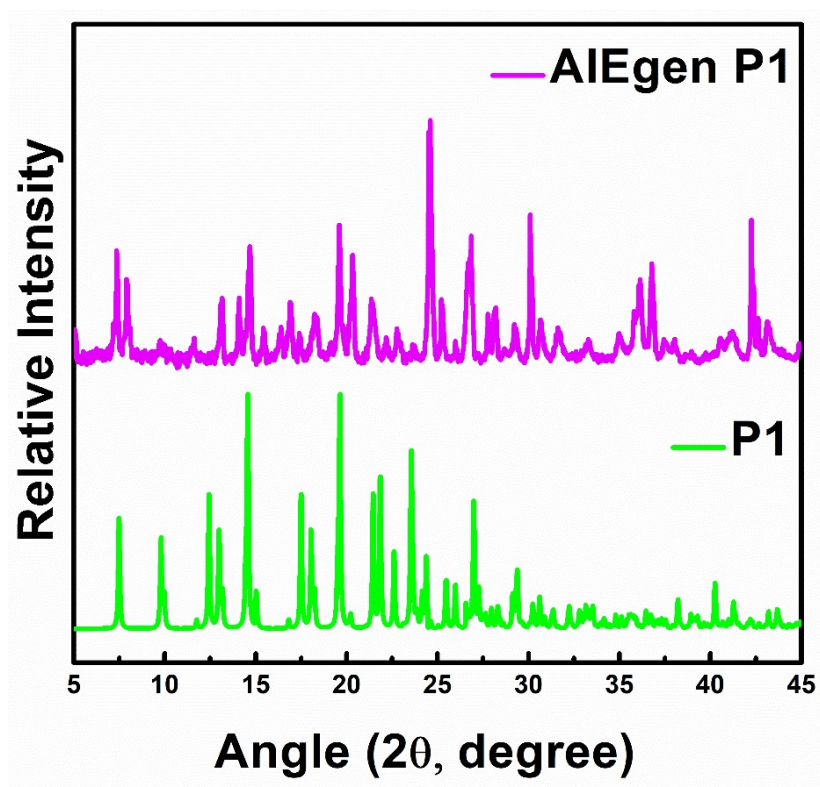

Figure S18: P-XRD of P1 as pristine compared with AlEgen P1 ( $f_w$  90 %).

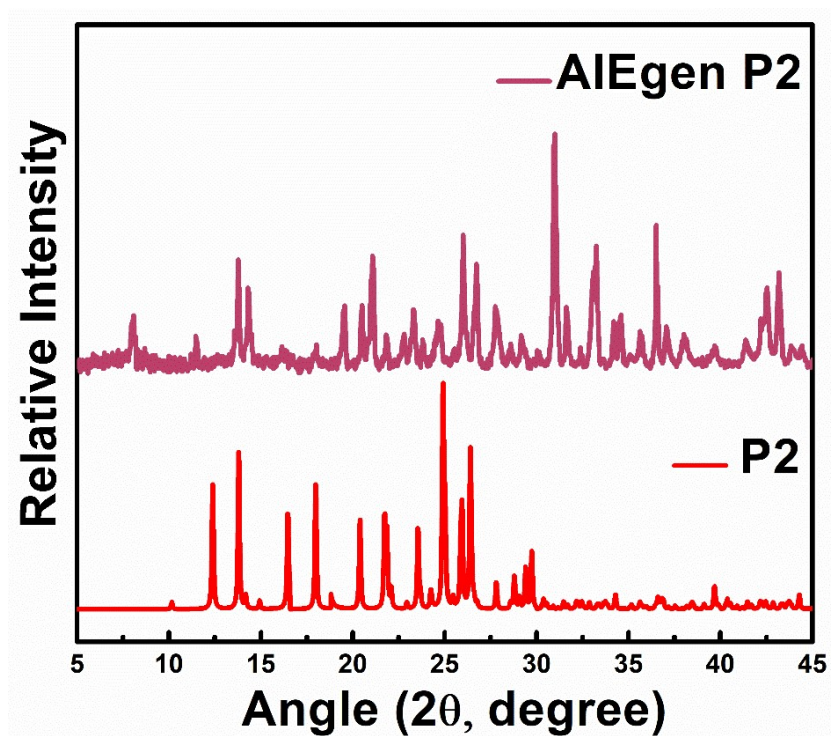

Figure S19: P-XRD of P2 as pristine compared with AlEgen P2 ( $f_w$  90 %).

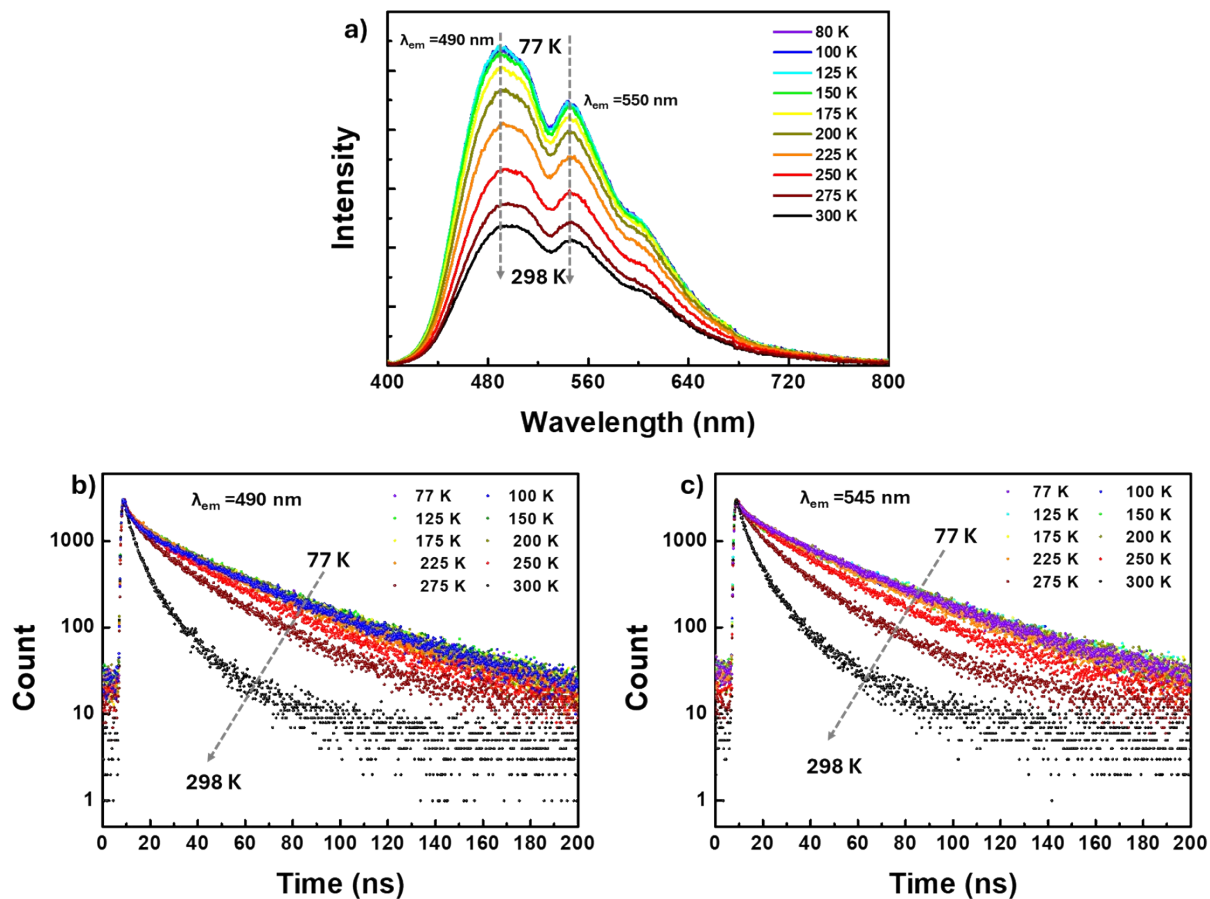

**Figure 20:** (a) Steady-state photoluminescence Spectra at  $\lambda_{ex} = 375$  nm and (b,c) fluorescence decay profiles for the pristine sample of **P1** at different temperatures (b)  $\lambda_{ex} = 375$  nm  $\lambda_{em} = 490$  nm and (c)  $\lambda_{ex} = 375$  nm  $\lambda_{em} = 545$  nm.

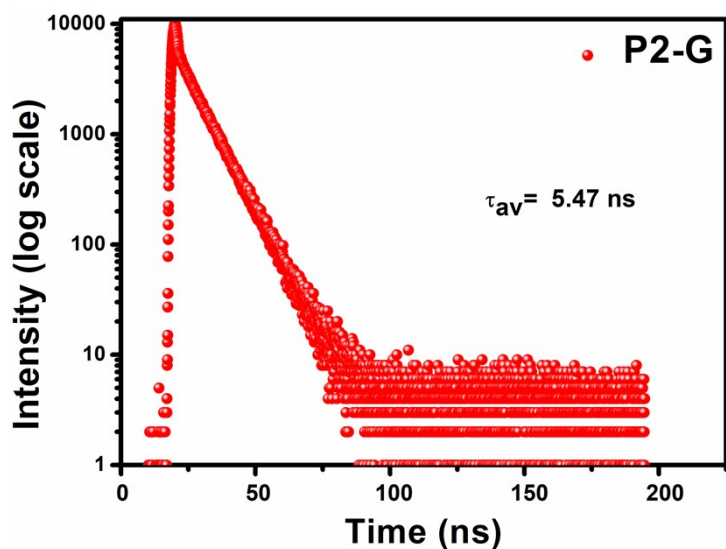

**Figure S21:** Fluorescence lifetime decay profile of **P2-G** at  $\lambda_{ex} = 354$  nm, pls put  $\lambda_{em} = 545$  nm.

**Table S3:** Lifetime values of the pristine sample of **P1** at different temperatures monitored at  $\lambda_{em} = 490$  and  $545$  nm and  $\lambda_{ex} = 375$  nm .

| Temperatur<br>e<br>(K) | 490                                 |                                     |                  | 545                                 |                                     |                  |
|------------------------|-------------------------------------|-------------------------------------|------------------|-------------------------------------|-------------------------------------|------------------|
|                        | $\tau_1$ [ns]<br>A <sub>1</sub> (%) | $\tau_2$ [ns]<br>A <sub>2</sub> (%) | $\tau_{av}$ [ns] | $\tau_1$ [ns]<br>A <sub>1</sub> (%) | $\tau_2$ [ns]<br>A <sub>2</sub> (%) | $\tau_{av}$ [ns] |
| 77                     | 6.05 ± 0.21<br>ns (9.36%)           | 37.55 ± 0.23<br>ns (90.64%)         | 34.60            | 9.27 ± 0.46<br>ns (9.27%)           | 40.43 ± 0.37<br>ns (90.73%)         | 37.54            |
| 100                    | 6.67 ± 0.21<br>ns (10.98%)          | 37.60 ± 0.26<br>ns (89.02%)         | 34.20            | 8.71 ± 0.44<br>ns (8.46%)           | 39.76 ± 0.33<br>ns (91.54%)         | 37.13            |
| 125                    | 6.28 ± 0.20<br>ns (10.43%)          | 37.36 ± 0.25<br>ns (89.57%)         | 34.11            | 7.18 ± 0.32<br>ns (7.57%)           | 38.89 ± 0.26<br>ns (92.43%)         | 36.49            |
| 150                    | 5.45 ± 0.17<br>ns (9.79%)           | 36.98 ± 0.22<br>ns (90.21%)         | 33.89            | 8.05 ± 0.36<br>ns (8.61%)           | 39.09 ± 0.30<br>ns (91.39%)         | 36.41            |
| 175                    | 5.76 ± 0.19<br>ns (9.78%)           | 36.44 ± 0.23<br>ns (90.22%)         | 33.44            | 6.93 ± 0.32<br>ns (7.25%)           | 38.08 ± 0.25<br>ns (92.75%)         | 35.82            |
| 200                    | 6.01 ± 0.19<br>ns (10.16%)          | 36.16 ± 0.23<br>ns (89.84%)         | 33.09            | 8.80 ± 0.46<br>ns (8.46%)           | 37.68 ± 0.30<br>ns (91.54%)         | 35.23            |
| 225                    | 6.6 ± 0.21 ns<br>(11.07%)           | 36.31 ± 0.24<br>ns (88.93%)         | 33.02            | 9.13 ± 0.46<br>ns (8.88%)           | 38.00 ± 0.32<br>ns (91.12%)         | 35.44            |
| 250                    | 6.37 ± 0.20<br>ns (11.78%)          | 33.92 ± 0.22<br>ns (88.22%)         | 30.67            | 10.54 ± 0.50<br>ns (12.51%)         | 36.54 ± 0.38<br>ns (87.49%)         | 33.28            |
| 275                    | 7.29 ± 0.25<br>ns (14.56%)          | 31.24 ± 0.25<br>ns (85.44%)         | 27.75            | 9.40 ± 0.36<br>ns (16.39%)          | 31.57 ± 0.32<br>ns (83.61%)         | 27.94            |
| 298 ambi               | 4.68 ± 0.07<br>ns (49.90%)          | 21.78 ± 0.32<br>ns (50.10%)         | 13.25            | 4.98 ± 0.07<br>ns (51.57%)          | 22.76 ± 0.36<br>ns (48.43%)         | 13.60            |
| 300                    | 4.5 ± 0.06 ns<br>(58.40%)           | 18.51 ± 0.32<br>ns (41.60%)         | 10.32            | 5.27 ± 0.07<br>ns (58.40%)          | 20.04 ± 0.36<br>ns (41.60%)         | 11.41            |

**Table S4:** Interaction and lattice energy (kJ/mol) calculation of **P1**.

|  | N | Symop            | R     | Electron Density | E_ele | E_pol | E_dis | E_rep | E_tot |
|--|---|------------------|-------|------------------|-------|-------|-------|-------|-------|
|  | 1 | -x, -y, z        | 7.12  | HF/3-21G         | 11.2  | -8.1  | -19.9 | 12.0  | -2.1  |
|  | 1 | -                | 8.59  | HF/3-21G         | -6.1  | -5.2  | -11.3 | 10.5  | -11.2 |
|  | 1 | -x, -y, z        | 10.94 | HF/3-21G         | 6.9   | -1.7  | -7.0  | 1.1   | 0.5   |
|  | 2 | x, y, z          | 11.99 | HF/3-21G         | -87.3 | -31.0 | -12.7 | 112.3 | -29.6 |
|  | 2 | -x+1/2, y+1/2, z | 6.89  | HF/3-21G         | 3.5   | -3.8  | -37.1 | 21.7  | -14.9 |
|  | 1 | -                | 4.92  | HF/3-21G         | 12.7  | -17.9 | -35.2 | 22.7  | -12.0 |
|  | 1 | -                | 8.36  | HF/3-21G         | -4.1  | -12.8 | -14.8 | 20.5  | -9.3  |
|  | 1 | -                | 6.89  | HF/3-21G         | -13.9 | -9.0  | -14.9 | 10.8  | -24.6 |
|  | 1 | -                | 9.63  | HF/3-21G         | -10.5 | -3.1  | -4.8  | 2.0   | -15.3 |
|  | 1 | -x, -y, z        | 3.76  | HF/3-21G         | -4.6  | -5.7  | -65.8 | 36.4  | -38.1 |
|  | 1 | -                | 6.41  | HF/3-21G         | 1.6   | -1.9  | 2.0   | 0.4   | -1.7  |
|  | 1 | -                | 7.76  | HF/3-21G         | 0.6   | 1.4   | 0.6   | 0.8   | 2.1   |

**Table S5:** Interaction and lattice energy (kJ/mol) calculation of **P2**.

|  | N | Symop            | R     | Electron Density | E_ele | E_pol | E_dis | E_rep | E_tot |
|--|---|------------------|-------|------------------|-------|-------|-------|-------|-------|
|  | 1 | -                | 7.12  | HF/3-21G         | 11.2  | -8.1  | -19.9 | 12.0  | -2.1  |
|  | 1 | -                | 8.59  | HF/3-21G         | -6.1  | -5.2  | -11.3 | 10.5  | -11.2 |
|  | 1 | -x, -y, z        | 10.94 | HF/3-21G         | 6.9   | -1.7  | -7.0  | 1.1   | 0.5   |
|  | 2 | x, y, z          | 11.99 | HF/3-21G         | -87.3 | -31.0 | -12.7 | 112.3 | -29.6 |
|  | 2 | -x+1/2, y+1/2, z | 6.89  | HF/3-21G         | 3.5   | -3.8  | -37.1 | 21.7  | -14.9 |
|  | 1 | -                | 4.92  | HF/3-21G         | 12.7  | -17.9 | -35.2 | 22.7  | -12.0 |
|  | 1 | -                | 8.36  | HF/3-21G         | -4.1  | -12.8 | -14.8 | 20.5  | -9.3  |
